# Supplementary material
Source: PubMed Central journal article supplement (PMC6733591)
Supplement: NIHMS1536156-supplement-Table_1-2___Note_1-2.pdf [file NIHMS1536156-supplement-Table_1-2___Note_1-2.pdf]

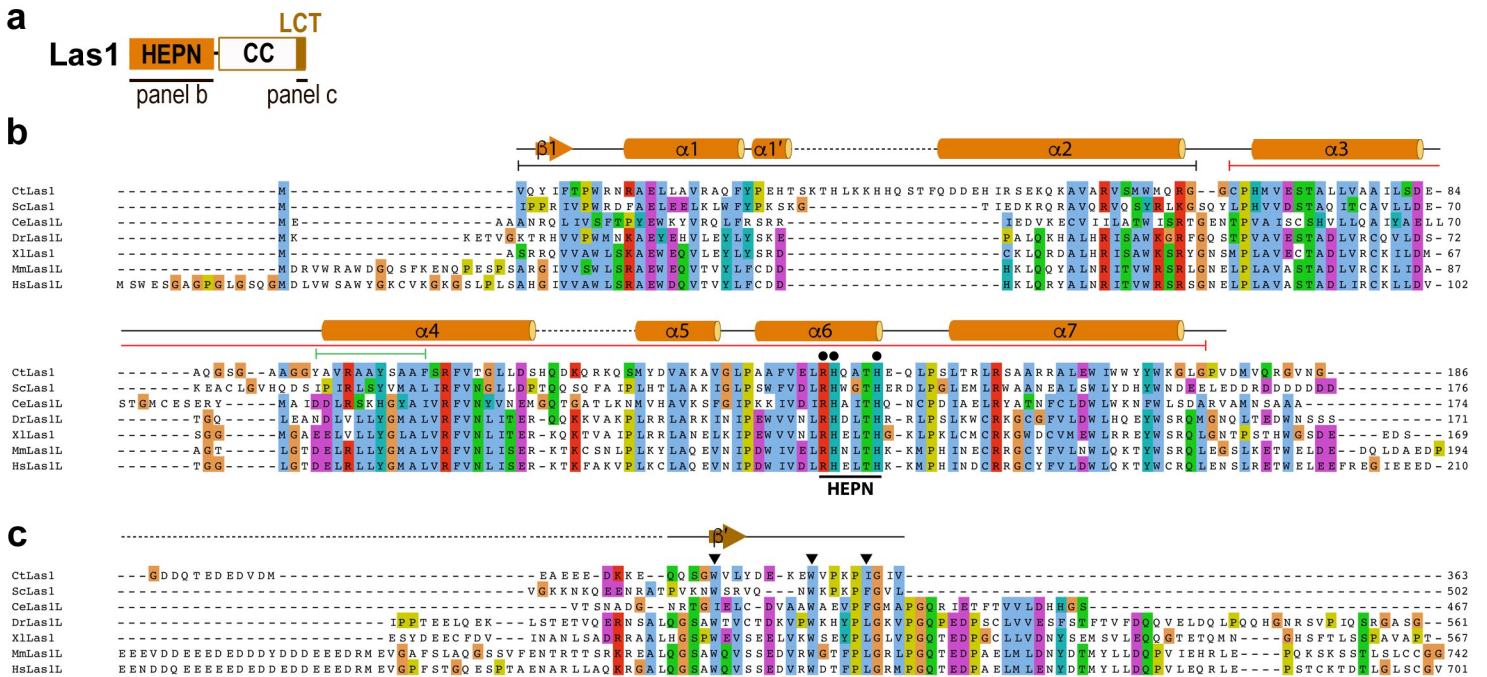

**Supplementary Note 1 | Las1 multiple amino acid sequence alignment.**

**a**, Schematic of Las1 domain boundaries. Black bars define the Las1 regions used to generate sequence alignments. The Las1 coiled-coil (CC) domain alignment is not displayed due to low sequence conservation. **b**, Sequence alignments for the Las1 HEPN nuclease domain. Alignments were performed with PROMALS3D (Pei, J. et al., *Nucleic Acids Res.* 36, 2295-2300, 2008) and illustrated in JalView (Waterhouse, A.M. et al., *Bioinformatics.* 25, 1189-1191, 2009). The secondary structure is shown above. The black bracket defines the N-terminus of Las1 that forms an interface with Grc3. The red bracket indicates the HEPN core and the green bracket in  $\alpha$ 4 marks the HEPN dimer interface. Residues targeted for mutagenesis are marked with a black dot. Abbreviations are as follows: *Chaetomium thermophilum* (Ct), *Saccharomyces cerevisiae* (Sc), *Caenorhabditis elegans* (Ce), *Danio rerio* (Dr), *Xenopus laevis* (Xl), *Mus Musculus* (Mm), and *Homo sapiens* (Hs). **c**, Sequence alignments for the Las1 C-terminal tail (LCT). Alignments were performed with PROMALS3D and illustrated in JalView as seen in panel B. Las1 LCT hydrophobic residues engaged with the Grc3 C-terminal domain are marked by arrowheads.

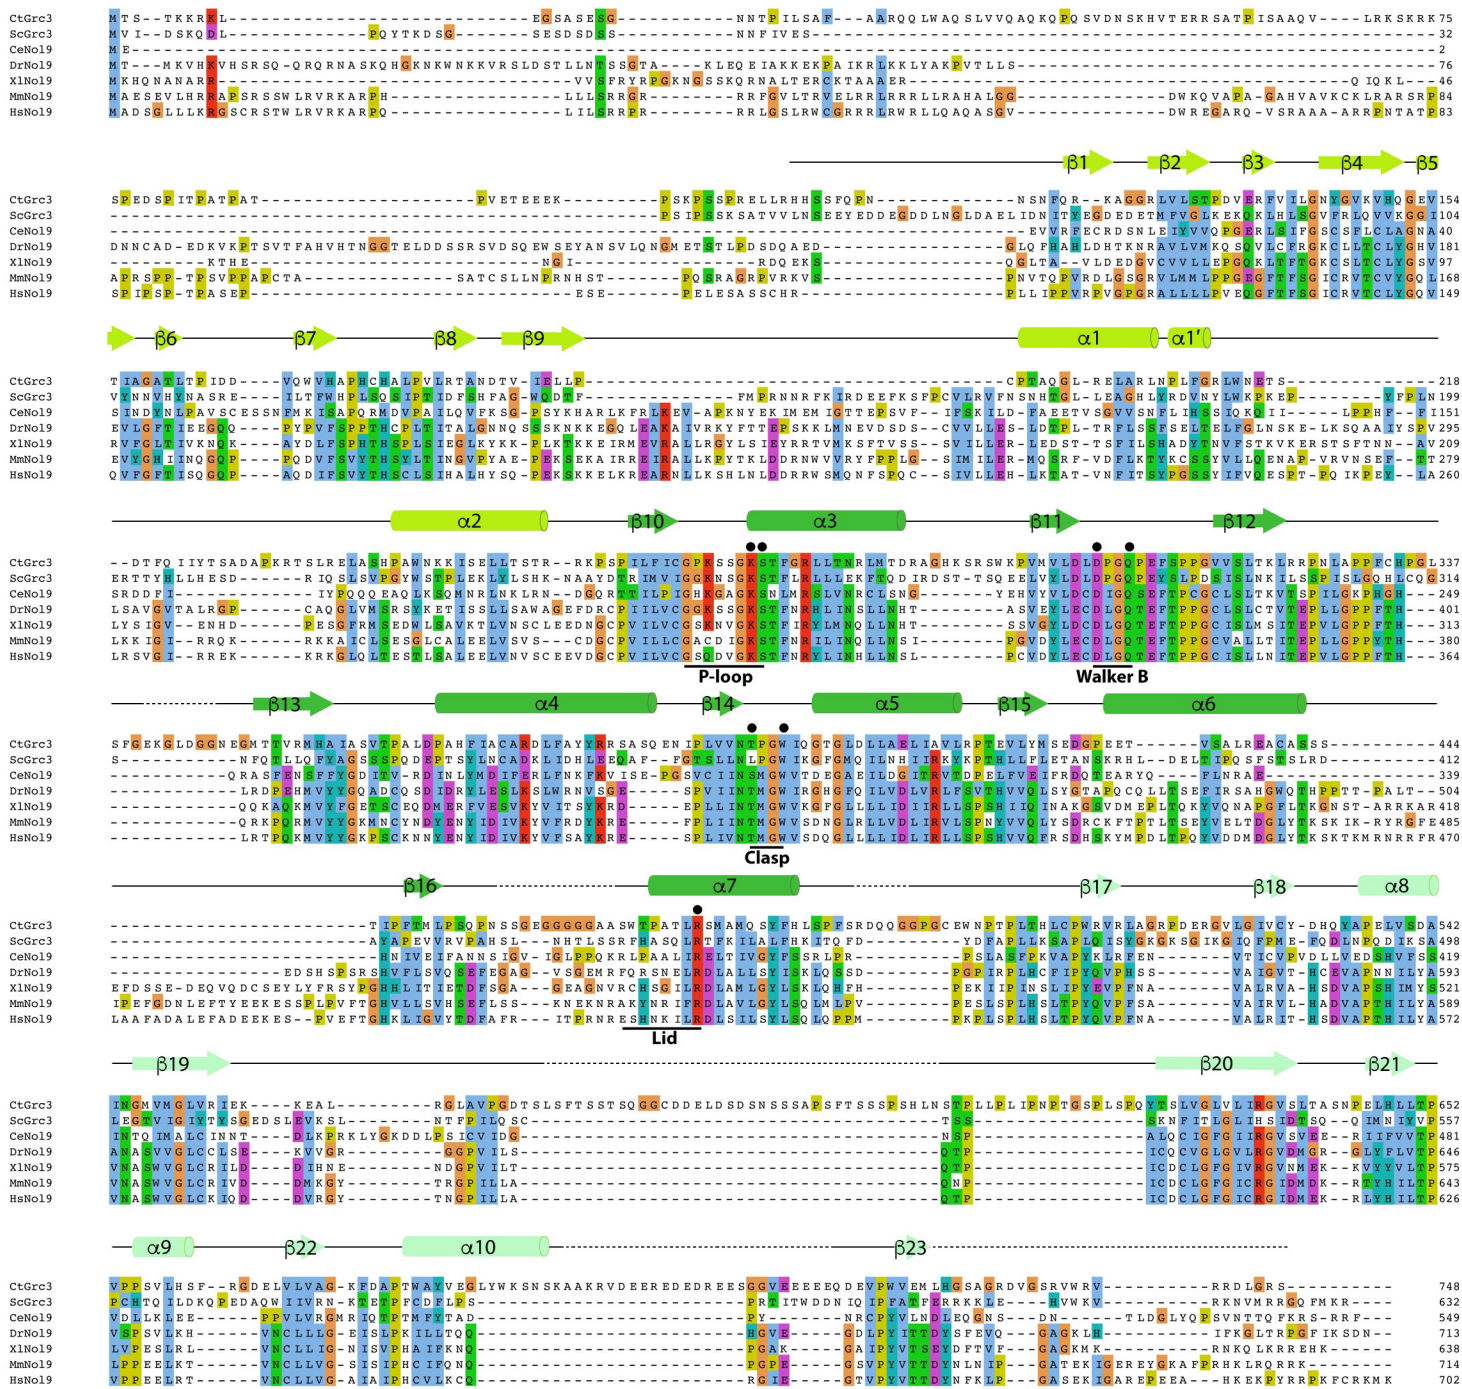

### Supplementary Note 2| Grc3 (No19) multiple amino acid sequence alignment.

Alignments of Grc3 and its mammalian homologs No19 were performed with PROMALS3D (Pei, J. et al., *Nucleic Acids Res.* 36, 2295-2300,2008) and illustrated in JalView (Waterhouse, A.M. et al., *Bioinformatics.* 25, 1189-1191, 2009). The secondary structure is shown above, with the NTD colored chartreuse, the PNK colored dark green, and the CTD colored light green. Residues previously shown to be important for Grc3 polynucleotide kinase activity are indicated with a dot (Pillon, M.C. et al., *RNA.* 24, 721-738, 2018). Abbreviations are as follows: Chaetomium thermophilum (Ct), Saccharomyces cerevisiae (Sc), Caenorhabditis elegans (Ce), Danio rerio (Dr), Xenopus laevis (XI), Mus Musculus (Mm), and Homo sapiens (Hs).

**Supplementary Table 1 | RNA oligos used in this study**

| RNA                 | Sequence                                                | Source |
|---------------------|---------------------------------------------------------|--------|
| SS-RNA              | 5'-ACGUACGCGGAAUACUUCGAA-3'                             | IDT    |
| SC-ITS2-3-RNA       | 5'-GUCGUUUUA-3'                                         | IDT    |
| SC-ITS2-5-RNA       | 5'-GGUUUUACCAACUGCGGC-3'                                | IDT    |
| SC-ITS2-cleaved-RNA | SC-ITS2-3-RNA annealed to SC-ITS2-5-RNA                 | IDT    |
| SC-ITS2-RNA         | 5'-GUCGUUUUAGGUUUUACCAACUGCGGC/36-FAM/-3'               | IDT    |
| CT-ITS2-RNA         | 5'-UGUGUUGGGGdeoxyACCCGCGGCUGCUCG<br>CGGGCCUGAAAAGCA-3' | IDT    |

**Supplementary Table 2 | Yeast strains used and constructed in this study**

| Strain                                         | Genotype                                                                                                                                                                                                                                                                                                | Source     |
|------------------------------------------------|---------------------------------------------------------------------------------------------------------------------------------------------------------------------------------------------------------------------------------------------------------------------------------------------------------|------------|
| CML476                                         | <i>MAT<math>\alpha</math></i> ; <i>ura3-52</i> ; <i>leu2<math>\Delta</math>1</i> ; <i>his3<math>\Delta</math>200</i> ; <i>GAL2</i> ; <i>CMVp(tetR'</i> - <i>SSN6)::LEU2</i> ; <i>trp1::tTa</i>                                                                                                          | EUROSCARF  |
| <i>tetO<sub>7</sub>-LAS1</i> (yMP 125)         | <i>MAT<math>\alpha</math></i> ; <i>ura3-52</i> ; <i>leu2<math>\Delta</math>1</i> ; <i>his3<math>\Delta</math>200</i> ; <i>GAL2</i> ; <i>CMVp(tetR'</i> - <i>SSN6)::LEU2</i> ; <i>trp1::tTa</i> ; <i>kanMX:tetO<sub>7</sub>:LAS1</i> ; <i>trp1:3Myc:GRC3</i>                                             | This Study |
| <i>tetO<sub>7</sub>-LAS1</i> + <i>pMP 580</i>  | <i>MAT<math>\alpha</math></i> ; <i>ura3-52</i> ; <i>leu2<math>\Delta</math>1</i> ; <i>his3<math>\Delta</math>200</i> ; <i>GAL2</i> ; <i>CMVp(tetR'</i> - <i>SSN6)::LEU2</i> ; <i>trp1::tTa</i> ; <i>kanMX:tetO<sub>7</sub>:LAS1</i> ; <i>trp1:3Myc:GRC3</i> ; <i>pMP 580 (3Flag-LAS1; WT)</i>           | This Study |
| <i>tetO<sub>7</sub>-LAS1</i> + <i>pMP 581</i>  | <i>MAT<math>\alpha</math></i> ; <i>ura3-52</i> ; <i>leu2<math>\Delta</math>1</i> ; <i>his3<math>\Delta</math>200</i> ; <i>GAL2</i> ; <i>CMVp(tetR'</i> - <i>SSN6)::LEU2</i> ; <i>trp1::tTa</i> ; <i>kanMX:tetO<sub>7</sub>:LAS1</i> ; <i>trp1:3Myc:GRC3</i> ; <i>pMP 655 (3Flag-LAS1; R129E, H134A)</i> | This Study |
| <i>tetO<sub>7</sub>-LAS1</i> + <i>pMP 655</i>  | <i>MAT<math>\alpha</math></i> ; <i>ura3-52</i> ; <i>leu2<math>\Delta</math>1</i> ; <i>his3<math>\Delta</math>200</i> ; <i>GAL2</i> ; <i>CMVp(tetR'</i> - <i>SSN6)::LEU2</i> ; <i>trp1::tTa</i> ; <i>kanMX:tetO<sub>7</sub>:LAS1</i> ; <i>trp1:3Myc:GRC3</i> ; <i>pMP 655 (3Flag-LAS1; H130A)</i>        | This Study |
| <i>tetO<sub>7</sub>-LAS1</i> + <i>YCplac33</i> | <i>MAT<math>\alpha</math></i> ; <i>ura3-52</i> ; <i>leu2<math>\Delta</math>1</i> ; <i>his3<math>\Delta</math>200</i> ; <i>GAL2</i> ; <i>CMVp(tetR'</i> - <i>SSN6)::LEU2</i> ; <i>trp1::tTa</i> ; <i>kanMX:tetO<sub>7</sub>:LAS1</i> ; <i>trp1:3Myc:GRC3</i> ; <i>YCplac33 (empty vector)</i>            | This Study |
