# Supplementary material
Source: PubMed Central journal article supplement (PMC6733591)

**Figure 1b**

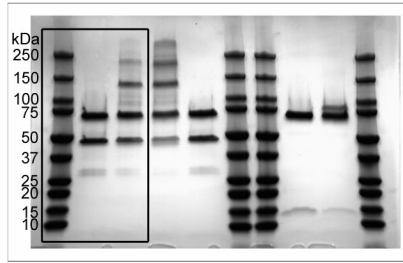

**Figure 4d**

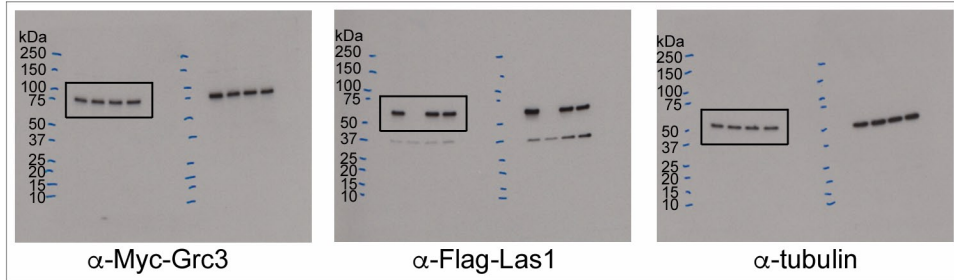

**Figure 4f**

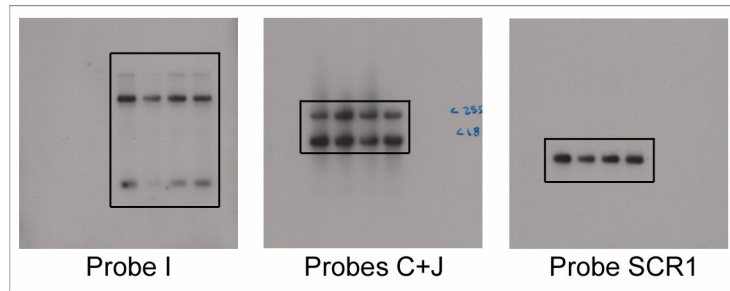

**Figure 4g**

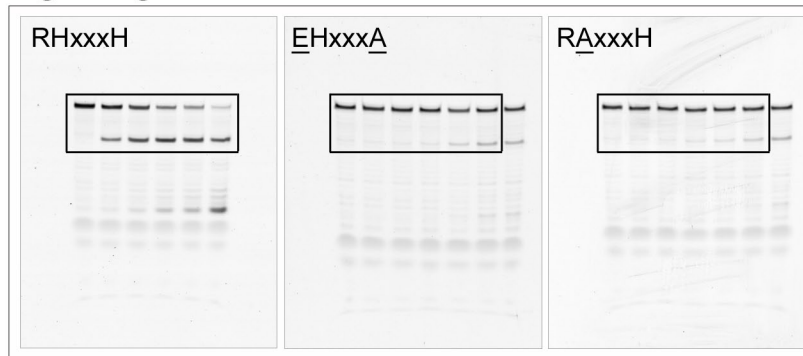

**Figure 5b**

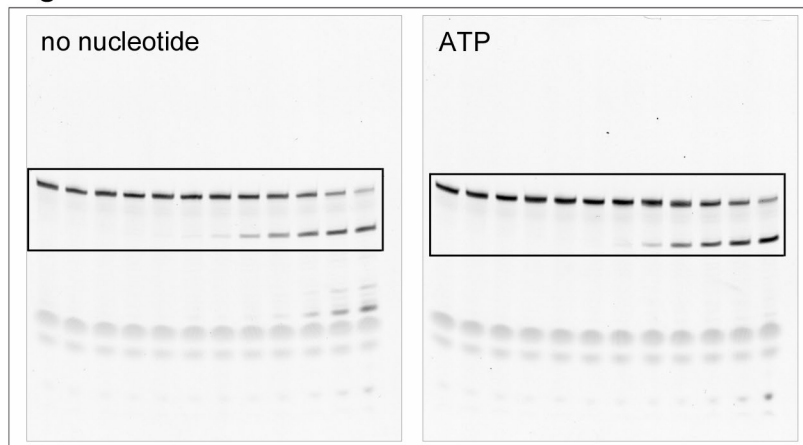

Supplement: NIHMS1536156-supplement-Data_Set.pdf [file NIHMS1536156-supplement-Data_Set.pdf]
